# Supplementary material for: Tracking Brain Development and Dimensional Psychiatric Symptoms in Children: A Longitudinal Population-Based Neuroimaging Study
Source: Atypon-hosted journal article supplement (doi:10.1176/appi.ajp.2017.16070813), 2017-08-18
Supplement: appi.ajp.2017.16070813.ds001.pdf [file appi.ajp.2017.16070813.ds001.pdf]

 


Psychiatry Online
